# Supplementary material for: High molecular weight SOA formation during limonene ozonolysis: insights from ultrahigh-resolution FT-ICR mass spectrometry characterization
Source: Copernicus journal article supplement (doi:10.5194/acp-12-5523-2012), 2012-06-25
Supplement: Supplementary file 1 [file acp-12-5523-2012-supplement.zip]

Archive with 3 entries (2 files):
- Kundu_ACP_2012_SI/
- Kundu_ACP_2012_SI/Kunduz_ACP_2012_SI.pdf
- Kundu_ACP_2012_SI/Table S1.xls
