# Supplementary material for: High molecular weight SOA formation during limonene ozonolysis: insights from ultrahigh-resolution FT-ICR mass spectrometry characterization
Source: Copernicus journal article supplement (doi:10.5194/acp-12-5523-2012), 2012-06-25
Supplement: Supplementary file 1 [file Table S1.xls]

## Sheet: Common of all
Table S1. A complete list of chemical compounds detected in limonene ozonolysis SOA.
Theoretical Neutral Mass	Internal Calibrants	Error (ppm)	DBE	#C	#H	#O	Average Relative Abundance
116.048		0.93	2	5	8	3	0.397967
128.048		0.79	3	6	8	3	0.457233
130.064		0.66	2	6	10	3	0.3738
132.043		0.65	2	5	8	4	0.2113
142.064		0.49	3	7	10	3	1.1039
144.043		0.44	3	6	8	4	1.08437
144.079		1.94	2	7	12	3	1.29237
146.058		0.44	2	6	10	4	0.505233
148.038		0.36	2	5	8	5	0.516967
156.043		0.3	4	7	8	4	0.835133
156.079		0.3	3	8	12	3	2.11083
158.058		0.28	3	7	10	4	3.9212
158.095		0.31	2	8	14	3	0.463567
160.038		0.24	3	6	8	5	0.324767
160.074		0.23	2	7	12	4	1.3046
162.053		0.25	2	6	10	5	1.1523
170.058		0.15	4	8	10	4	1.61177
170.095		0.18	3	9	14	3	4.66747
172.038		0.14	4	7	8	5	0.678733
172.074		0.09	3	8	12	4	30.3402
172.11		0.14	2	9	16	3	0.287267
174.053		0.14	3	7	10	5	3.4112
174.09		0.17	2	8	14	4	2.02007
176.069		0.17	2	7	12	5	1.34657
178.048		0.13	2	6	10	6	0.2127
184.074		0.1	4	9	12	4	3.56807
184.11		0.11	3	10	16	3	5.6878
186.053		0.05	4	8	10	5	1.80593
186.09		0.04	3	9	14	4	85.5848
188.033		0.12	4	7	8	6	0.250367
188.069		0.07	3	8	12	5	17.3307
188.105		0.12	2	9	16	4	0.917233
190.048	Y	0.07	3	7	10	6	2.33573
190.085		0.07	2	8	14	5	4.1243
192.064		0.05	2	7	12	6	0.923633
198.053		0.04	5	9	10	5	0.599733
198.09		0.07	4	10	14	4	2.39373
200.069		0.03	4	9	12	5	6.2959
200.105		0.02	3	10	16	4	21.4297
202.048		0.04	4	8	10	6	1.37323
202.085		0	3	9	14	5	20.0631
202.121		0.08	2	10	18	4	0.9266
204.064	Y	0.05	3	8	12	6	6.20023
204.1		0.04	2	9	16	5	2.66043
206.043		0.09	3	7	10	7	0.3289
206.08		0	2	8	14	6	8.08267
208.059		0.07	2	7	12	7	0.595933
208.095		0.02	1	8	16	6	0.347033
212.069		0.01	5	10	12	5	1.11717
212.105		0.05	4	11	16	4	0.347933
214.048		0.03	5	9	10	6	0.344167
214.085		0.01	4	10	14	5	10.9541
214.121		0.01	3	11	18	4	0.316833
216.064		0	4	9	12	6	4.51463
216.1		0.11	3	10	16	5	33.4024
216.137		0.1	2	11	20	4	0.1482
218.043		0.05	4	8	10	7	0.839733
218.08	Y	0.1	3	9	14	6	37.6595
218.116		0.04	2	10	18	5	1.5524
220.059		0	3	8	12	7	2.2226
220.095		0.05	2	9	16	6	13.89
222.075		0.01	2	8	14	7	2.2305
222.111		0.04	1	9	18	6	0.227167
226.085		0.05	5	11	14	5	0.405333
226.121		0.02	4	12	18	4	0.215767
228.064		0.06	5	10	12	6	0.944433
228.1		0.04	4	11	16	5	2.9385
230.043		0.02	5	9	10	7	0.252
230.08		0.03	4	10	14	6	11.8237
230.116		0.04	3	11	18	5	11.3798
232.059		0	4	9	12	7	2.49647
232.095	Y	0.18	3	10	16	6	62.7694
232.132		0.02	2	11	20	5	0.819967
234.075		0	3	9	14	7	6.51083
234.111		0.01	2	10	18	6	8.75283
236.054		0.1	3	8	12	8	0.5751
236.09		0	2	9	16	7	4.3216
236.127		0.02	1	10	20	6	0.302133
238.069		0.04	2	8	14	8	1.39317
240.1		0.02	5	12	16	5	0.390467
240.137		0.03	4	13	20	4	0.375
242.08		0.04	5	11	14	6	0.918467
242.116		0.02	4	12	18	5	1.91413
244.059		0	5	10	12	7	0.773767
244.095		0.05	4	11	16	6	7.47873
244.132		0.02	3	12	20	5	0.572733
246.075		0	4	10	14	7	7.6268
246.111	Y	0.29	3	11	18	6	84.7964
246.147		0.03	2	12	22	5	0.123233
248.054		0.05	4	9	12	8	0.5267
248.09		0.05	3	10	16	7	19.2927
248.127		0.1	2	11	20	6	14.9068
250.069		0.02	3	9	14	8	1.2568
250.106		0.02	2	10	18	7	8.0681
250.142		0.03	1	11	22	6	4.8167
252.085		0.02	2	9	16	8	0.8095
252.1		0.02	6	13	16	5	0.1771
254.08		0.03	6	12	14	6	0.1637
254.116		0.08	5	13	18	5	0.386833
254.152		0.04	4	14	22	4	0.156033
256.095		0.06	5	12	16	6	0.584633
256.132		0.01	4	13	20	5	0.736767
258.075		0.04	5	11	14	7	1.09083
258.111		0.02	4	12	18	6	1.72447
258.147		0.04	3	13	22	5	0.3422
260.054		0.02	5	10	12	8	0.263667
260.09		0.08	4	11	16	7	12.5905
260.127	Y	0.05	3	12	20	6	1.5199
262.069		0.01	4	10	14	8	2.27847
262.106		0.24	3	11	18	7	50.8528
262.142		0.08	2	12	22	6	0.365933
264.085		0.03	3	10	16	8	7.0821
264.121		0.06	2	11	20	7	13.5446
266.101		0.01	2	10	18	8	4.37953
266.116		0.05	6	14	18	5	0.233
268.095		0.07	6	13	16	6	0.251233
268.132		0.07	5	14	20	5	0.4839
270.075		0.2	6	12	14	7	0.1619
270.111		0.04	5	13	18	6	0.827367
270.147		0.01	4	14	22	5	0.628167
272.09		0.06	5	12	16	7	0.8697
272.127		0.01	4	13	20	6	1.1765
272.163		0.06	3	14	24	5	0.297133
274.069		0.07	5	11	14	8	0.7689
274.106		0	4	12	18	7	7.24063
274.142	Y	0.06	3	13	22	6	0.737533
276.085		0.03	4	11	16	8	6.7999
276.121		0.01	3	12	20	7	3.56667
278.064		0.08	4	10	14	9	0.331867
278.101		0.1	3	11	18	8	24.8956
278.137		0.03	2	12	22	7	1.69917
280.08		0.01	3	10	16	9	0.869067
280.116		0.04	2	11	20	8	7.4039
280.132		0.08	6	15	20	5	0.303367
282.096		0.07	2	10	18	9	0.827267
282.111		0.01	6	14	18	6	0.3408
282.147		0.04	5	15	22	5	0.482633
284.09		0.18	6	13	16	7	0.235167
284.127		0.01	5	14	20	6	0.890733
284.163		0.08	4	15	24	5	0.5396
286.106		0.03	5	13	18	7	1.00877
286.142		0.03	4	14	22	6	1.1087
286.179		0.15	3	15	26	5	0.267567
288.085		0.06	5	12	16	8	0.740133
288.121		0.03	4	13	20	7	3.8519
288.158	Y	0.05	3	14	24	6	0.468667
290.064		0.04	5	11	14	9	0.147067
290.101		0.01	4	12	18	8	4.7745
290.137		0	3	13	22	7	1.43223
292.08		0.05	4	11	16	9	1.26173
292.116		0	3	12	20	8	3.68313
292.153		0.01	2	13	24	7	0.281667
294.096		0.01	3	11	18	9	3.4197
294.111		0.02	7	15	18	6	0.231533
294.132		0.04	2	12	22	8	0.684433
294.147		0	6	16	22	5	0.346133
296.111		0.01	2	11	20	9	2.0238
296.127		0.03	6	15	20	6	0.575767
296.163		0.04	5	16	24	5	0.4975
298.106		0.05	6	14	18	7	0.486267
298.142		0.01	5	15	22	6	1.49257
298.179		0.09	4	16	26	5	0.598
300.085		0.14	6	13	16	8	0.206067
300.121		0.03	5	14	20	7	1.73457
300.158		0.01	4	15	24	6	1.34953
302.101		0.01	5	13	18	8	1.01397
302.137		0.03	4	14	22	7	2.55033
302.173	Y	0.03	3	15	26	6	0.4502
304.08		0.07	5	12	16	9	0.365867
304.116		0.01	4	13	20	8	4.47177
304.153		0	3	14	24	7	0.982433
306.096		0.02	4	12	18	9	1.86963
306.132		0.01	3	13	22	8	1.40023
306.168		0.12	2	14	26	7	0.162533
308.075		0.06	4	11	16	10	0.2002
308.111		0	3	12	20	9	1.31823
308.127		0.05	7	16	20	6	0.3739
308.148		0.06	2	13	24	8	0.248533
308.163		0.08	6	17	24	5	0.3399
310.091		0.01	3	11	18	10	0.675467
310.106		0.02	7	15	18	7	0.256067
310.127		0.04	2	12	22	9	0.274
310.142		0.07	6	16	22	6	0.774667
310.179		0.01	5	17	26	5	0.4643
312.121		0.03	6	15	20	7	0.8665
312.158		0	5	16	24	6	1.86117
312.194		0.13	4	17	28	5	0.321467
314.101		0.01	6	14	18	8	0.460533
314.137		0	5	15	22	7	2.64477
314.173		0.01	4	16	26	6	1.56473
316.116		0.03	5	14	20	8	1.82477
316.153		0.04	4	15	24	7	2.93187
316.189	Y	0.01	3	16	28	6	0.414367
318.096		0.09	5	13	18	9	0.544633
318.132		0.01	4	14	22	8	2.39223
318.168		0.01	3	15	26	7	0.894567
320.111		0	4	13	20	9	1.4419
320.148		0.03	3	14	24	8	0.9514
322.091		0.13	4	12	18	10	0.371767
322.127		0.07	3	13	22	9	0.707233
322.142		0.05	7	17	22	6	0.450933
322.179		0.01	6	18	26	5	0.287633
324.106		0.18	3	12	20	10	0.4014
324.121		0.03	7	16	20	7	0.4512
324.143		0.06	2	13	24	9	0.144067
324.158		0.06	6	17	24	6	0.943567
324.194		0.04	5	18	28	5	0.463633
326.101		0.07	7	15	18	8	0.241933
326.137		0.04	6	16	22	7	1.41847
326.173		0.01	5	17	26	6	2.0577
326.21		0	4	18	30	5	0.3762
328.116		0.02	6	15	20	8	0.997233
328.153		0.05	5	16	24	7	3.9521
328.189		0	4	17	28	6	1.2131
330.096		0.04	6	14	18	9	0.306367
330.132		0.03	5	15	22	8	3.27953
330.168		0.01	4	16	26	7	3.08167
330.205	Y	0.03	3	17	30	6	0.2317
332.111		0.1	5	14	20	9	1.01943
332.148		0.06	4	15	24	8	3.50927
332.184		0.01	3	16	28	7	0.791667
334.127		0.01	4	14	22	9	1.38
334.163		0.04	3	15	26	8	0.914933
336.106		0.09	4	13	20	10	0.449933
336.121		0.06	8	17	20	7	0.179
336.143		0.06	3	14	24	9	0.567667
336.158		0.03	7	18	24	6	0.378167
338.122		0.02	3	13	22	10	0.260067
338.137		0.03	7	17	22	7	0.6909
338.173		0.02	6	18	26	6	0.8367
338.21		0.04	5	19	30	5	0.3606
340.116		0.02	7	16	20	8	0.470267
340.153		0.03	6	17	24	7	2.16723
340.189		0.01	5	18	28	6	2.2137
342.096		0.1	7	15	18	9	0.182633
342.132		0.06	6	16	22	8	2.08793
342.168		0.08	5	17	26	7	5.38973
342.205		0.04	4	18	30	6	0.9034
344.111		0.05	6	15	20	9	0.879667
344.148		0.05	5	16	24	8	7.86033
344.184		0.08	4	17	28	7	3.86223
346.127		0.06	5	15	22	9	2.4364
346.163		0.05	4	16	26	8	6.1414
346.2		0.07	3	17	30	7	0.589433
348.106	Y	0.12	5	14	20	10	0.455733
348.143		0.03	4	15	24	9	2.46547
348.179		0.06	3	16	28	8	1.14357
350.122		0.02	4	14	22	10	0.6162
350.137		0.1	8	18	22	7	0.204233
350.158		0.03	3	15	26	9	0.6144
350.173		0.01	7	19	26	6	0.321433
352.116		0.13	8	17	20	8	0.2247
352.137		0.09	3	14	24	10	0.286433
352.153		0.01	7	18	24	7	0.746367
352.189		0.02	6	19	28	6	1.06373
354.132		0.09	7	17	22	8	0.862667
354.168		0.07	6	18	26	7	3.20127
354.205		0	5	19	30	6	1.8524
356.111		0.02	7	16	20	9	0.407
356.148		0.08	6	17	24	8	4.1875
356.184		0.07	5	18	28	7	6.33503
356.22		0.08	4	19	32	6	0.4857
358.127		0.05	6	16	22	9	2.24057
358.163		0.01	5	17	26	8	15.1344
358.2		0	4	18	30	7	3.61793
360.106		0.04	6	15	20	10	0.497767
360.143		0.05	5	16	24	9	6.61647
360.179		0.02	4	17	28	8	8.34573
360.215		0.03	3	18	32	7	0.439467
362.122	Y	0.1	5	15	22	10	1.33487
362.158		0.07	4	16	26	9	4.95097
362.195		0.04	3	17	30	8	1.2867
364.137		0.04	4	15	24	10	1.30147
364.153		0.05	8	19	24	7	0.246333
364.174		0.04	3	16	28	9	1.10757
366.132		0.13	8	18	22	8	0.287233
366.153		0.04	3	15	26	10	0.399233
366.168		0.01	7	19	26	7	0.775433
366.205		0.02	6	20	30	6	0.3349
368.111		0.14	8	17	20	9	0.186133
368.148		0.03	7	18	24	8	1.24277
368.184		0.04	6	19	28	7	4.2587
368.22		0.02	5	20	32	6	0.6847
370.127		0.01	7	17	22	9	0.923333
370.163		0.06	6	18	26	8	7.8319
370.2		0.05	5	19	30	7	7.50047
370.236		0	4	20	34	6	0.295167
372.106		0	7	16	20	10	0.327733
372.143		0.09	6	17	24	9	5.4334
372.179		0.03	5	18	28	8	21.5378
372.215		0.02	4	19	32	7	2.90207
374.122		0.03	6	16	22	10	1.40353
374.158		0.04	5	17	26	9	13.6377
374.195		0.02	4	18	30	8	10.1989
374.231		0.04	3	19	34	7	0.2524
376.137	Y	0.05	5	16	24	10	3.85747
376.174		0.07	4	17	28	9	9.46753
376.21		0.07	3	18	32	8	1.54073
378.117		0.05	5	15	22	11	0.506867
378.153		0.06	4	16	26	10	2.80333
378.19		0.06	3	17	30	9	1.48153
380.132		0.06	4	15	24	11	0.5066
380.148		0.12	8	19	24	8	0.3621
380.169		0.02	3	16	28	10	0.664633
380.184		0.05	7	20	28	7	0.463667
382.127		0.02	8	18	22	9	0.296767
382.148		0.07	3	15	26	11	0.1784
382.163		0.01	7	19	26	8	1.4777
382.2		0.04	6	20	30	7	1.75773
384.143		0.05	7	18	24	9	1.6277
384.179		0.03	6	19	28	8	8.81787
384.215		0.03	5	20	32	7	3.99283
386.122		0.04	7	17	22	10	0.799833
386.158		0.08	6	18	26	9	9.2289
386.195		0.04	5	19	30	8	20.4883
386.231		0.05	4	20	34	7	1.29667
388.137		0.06	6	17	24	10	3.6844
388.174		0.03	5	18	28	9	24.4644
388.21		0.06	4	19	32	8	7.3769
388.247		0.07	3	20	36	7	0.2142
390.117		0.11	6	16	22	11	0.630833
390.153		0.11	5	17	26	10	10.1008
390.19		0.07	4	18	30	9	13.7167
390.226		0.06	3	19	34	8	0.788767
392.132		0.05	5	16	24	11	1.47457
392.169		0.08	4	17	28	10	6.70007
392.205		0.05	3	18	32	9	2.043
394.148		0.07	4	16	26	11	1.17203
394.163		0.05	8	20	26	8	0.283367
394.184		0.07	3	17	30	10	1.21853
396.127		0.01	4	15	24	12	0.177233
396.143		0.04	8	19	24	9	0.447433
396.164		0.06	3	16	28	11	0.340833
396.179		0.08	7	20	28	8	1.36317
396.215		0.06	6	21	32	7	0.4359
398.122		0.08	8	18	22	10	0.242933
398.158		0.05	7	19	26	9	2.43823
398.195		0.05	6	20	30	8	8.76303
398.231		0.06	5	21	34	7	0.623067
400.137		0.09	7	18	24	10	1.61997
400.174		0.05	6	19	28	9	13.4427
400.21		0.01	5	20	32	8	14.2442
400.247		0.03	4	21	36	7	0.951133
402.117		0.01	7	17	22	11	0.452433
402.153		0.11	6	18	26	10	8.71243
402.19		0.11	5	19	30	9	34.5484
402.226		0.03	4	20	34	8	5.9642
404.132		0.06	6	17	24	11	1.97673
404.169		0.02	5	18	28	10	22.9536
404.205		0.02	4	19	32	9	14.4174
404.242		0.01	3	20	36	8	0.7808
406.112		0.1	6	16	22	12	0.2154
406.148		0.08	5	17	26	11	4.3813
406.184		0.06	4	18	30	10	13.6843
406.221		0.01	3	19	34	9	1.75157
408.127		0.05	5	16	24	12	0.4733
408.164		0.08	4	17	28	11	3.39187
408.2		0.09	3	18	32	10	1.9182
410.143		0.09	4	16	26	12	0.389333
410.158		0.09	8	20	26	9	0.423467
410.179		0.02	3	17	30	11	0.7865
410.195		0.07	7	21	30	8	0.509867
412.137		0.08	8	19	24	10	0.459833
412.174		0.02	7	20	28	9	2.48667
412.21		0.03	6	21	32	8	1.68793
414.117		0.02	8	18	22	11	0.185267
414.153		0.05	7	19	26	10	2.59203
414.19		0.05	6	20	30	9	12.769
414.226		0.04	5	21	34	8	4.30133
416.132		0.05	7	18	24	11	1.16167
416.169		0.08	6	19	28	10	15.8515
416.205		0.05	5	20	32	9	28.6103
416.242		0.06	4	21	36	8	2.9584
418.112		0.04	7	17	22	12	0.206767
418.148		0.08	6	18	26	11	5.27373
418.184	Y	0.06	5	19	30	10	34.8422
418.221		0.01	4	20	34	9	11.3457
418.257		0.06	3	21	38	8	0.199567
420.127		0.04	6	17	24	12	0.762
420.164		0.1	5	18	28	11	12.3818
420.2		0	4	19	32	10	20.902
420.236		0.04	3	20	36	9	1.4197
422.143		0.05	5	17	26	12	1.60107
422.179		0.09	4	18	30	11	7.69107
422.216		0.05	3	19	34	10	2.35997
424.159		0.02	4	17	28	12	1.21623
424.174		0.06	8	21	28	9	0.328033
424.195		0.02	3	18	32	11	1.3896
424.21		0.01	7	22	32	8	0.287667
426.153		0.04	8	20	26	10	0.554
426.174		0.02	3	17	30	12	0.3406
426.19		0.08	7	21	30	9	1.26533
426.226		0.13	6	22	34	8	0.5637
428.132		0.02	8	19	24	11	0.3703
428.169		0.01	7	20	28	10	3.31213
428.205		0.02	6	21	32	9	6.62857
428.242		0.1	5	22	36	8	0.489767
430.148		0.1	7	19	26	11	2.09843
430.184		0.05	6	20	30	10	20.31
430.221		0.02	5	21	34	9	10.2474
430.257		0.19	4	22	38	8	0.183533
432.127		0.1	7	18	24	12	0.5494
432.164		0.08	6	19	28	11	9.81197
432.2	Y	0.07	5	20	32	10	33.1432
432.236		0.02	4	21	36	9	7.75367
434.143		0.08	6	18	26	12	2.24193
434.179		0.06	5	19	30	11	19.8815
434.216		0.03	4	20	34	10	15.7504
434.252		0.02	3	21	38	9	0.851267
436.122		0.02	6	17	24	13	0.1966
436.159		0	5	18	28	12	4.45247
436.195		0.02	4	19	32	11	11.2995
436.231		0.02	3	20	36	10	1.8974
438.138		0.03	5	17	26	13	0.406033
438.174		0.09	4	18	30	12	2.7975
438.19		0.04	8	22	30	9	0.288933
438.211		0.01	3	19	34	11	1.5668
438.226		0.18	7	23	34	8	0.272033
440.154		0.2	4	17	28	13	0.328433
440.169		0.39	8	21	28	10	0.455167
440.19		0.08	3	18	32	12	0.647933
440.205		0.03	7	22	32	9	0.7352
440.242		0.08	6	23	36	8	0.3763
442.148		0.16	8	20	26	11	0.485533
442.184		0.01	7	21	30	10	2.16103
442.221		0.04	6	22	34	9	1.5867
442.257		0.06	5	23	38	8	0.2526
444.127		0.1	8	19	24	12	0.201767
444.164		0.03	7	20	28	11	2.8564
444.2		0.05	6	21	32	10	8.96347
444.236		0.01	5	22	36	9	1.40907
446.143		0.03	7	19	26	12	1.12177
446.179		0.06	6	20	30	11	13.0284
446.216	Y	0.04	5	21	34	10	20.765
446.252		0.06	4	22	38	9	0.487667
448.122		0.24	7	18	24	13	0.173567
448.159		0.08	6	19	28	12	4.86987
448.195		0.03	5	20	32	11	22.5472
448.231		0.05	4	21	36	10	7.26523
450.138		0.04	6	18	26	13	0.616367
450.174		0.11	5	19	30	12	7.81143
450.211		0.04	4	20	34	11	12.9373
450.247		0.04	3	21	38	10	3.09577
452.154		0.01	5	18	28	13	1.10137
452.169		0.84	9	22	28	10	0.1529
452.19		0.04	4	19	32	12	4.7399
452.205		0.06	8	23	32	9	0.321533
452.226		0	3	20	36	11	1.94733
452.242		0.11	7	24	36	8	0.257567
454.169		0.02	4	18	30	13	0.695633
454.184		0.29	8	22	30	10	0.410367
454.206		0.03	3	19	34	12	0.7243
454.221		0	7	23	34	9	0.694567
454.257		0.12	6	24	38	8	0.312867
456.164		0.18	8	21	28	11	0.466767
456.2		0.02	7	22	32	10	1.36867
456.236		0.05	6	23	36	9	1.04477
458.143		0.36	8	20	26	12	0.304933
458.179		0.09	7	21	30	11	2.19957
458.216		0	6	22	34	10	2.87963
458.252		0.06	5	23	38	9	0.618267
460.159		0.06	7	20	28	12	1.7322
460.195		0.03	6	21	32	11	8.64257
460.231	Y	0.01	5	22	36	10	2.51953
460.268		0.06	4	23	40	9	0.145867
462.138		0.17	7	19	26	13	0.4016
462.174		0.1	6	20	30	12	6.75237
462.211		0.07	5	21	34	11	13.5258
462.247		0	4	22	38	10	0.716633
464.154		0.07	6	19	28	13	1.34113
464.19		0.08	5	20	32	12	10.5499
464.226		0.05	4	21	36	11	6.8309
466.169		0.02	5	19	30	13	2.1439
466.184		0.47	9	23	30	10	0.1812
466.206		0.05	4	20	34	12	5.7741
466.221		0.1	8	24	34	9	0.315133
466.242		0.05	3	21	38	11	1.01077
466.257		0.01	7	25	38	8	0.231833
468.148		0.1	5	18	28	14	0.209033
468.164		0.83	9	22	28	11	0.158967
468.185		0.04	4	19	32	13	1.3203
468.2		0.25	8	23	32	10	0.558333
468.221		0	3	20	36	12	0.990633
468.236		0.03	7	24	36	9	0.761133
468.273		0.05	6	25	40	8	0.2379
470.179		0.33	8	22	30	11	0.5247
470.216		0.05	7	23	34	10	1.39627
470.252		0	6	24	38	9	0.886933
472.159		0.2	8	21	28	12	0.333233
472.195		0.05	7	22	32	11	1.72773
472.231		0.01	6	23	36	10	1.86263
472.268		0.11	5	24	40	9	0.417867
474.138		0.14	8	20	26	13	0.155433
474.174		0.03	7	21	30	12	1.57007
474.211		0.11	6	22	34	11	4.28453
474.247	Y	0.01	5	23	38	10	1.06953
476.154		0.07	7	20	28	13	0.742467
476.19		0.09	6	21	32	12	5.14287
476.226		0.04	5	22	36	11	2.69577
476.263		0.04	4	23	40	10	0.2465
478.169		0.1	6	20	30	13	2.3197
478.206		0.03	5	21	34	12	14.2194
478.242		0.04	4	22	38	11	1.20487
480.148		0.18	6	19	28	14	0.303667
480.185		0.09	5	20	32	13	3.48077
480.2		0.03	9	24	32	10	0.2547
480.221		0.04	4	21	36	12	5.6076
480.236		0.12	8	25	36	9	0.366033
480.258		0.03	3	22	40	11	0.117633
480.273		0	7	26	40	8	0.183833
482.164		0.01	5	19	30	14	0.451233
482.179		0.48	9	23	30	11	0.2442
482.2		0.02	4	20	34	13	2.13383
482.216		0.06	8	24	34	10	0.712333
482.237		0.07	3	21	38	12	0.669267
482.252		0.07	7	25	38	9	0.854233
482.289		0.06	6	26	42	8	0.202533
484.18		0.09	4	19	32	14	0.301333
484.195		0.15	8	23	32	11	0.756967
484.231		0.1	7	24	36	10	1.68133
484.268		0.07	6	25	40	9	0.857033
486.211		0.03	7	23	34	11	1.9072
486.247		0.04	6	24	38	10	1.88807
486.283		0.14	5	25	42	9	0.309
488.154		0.03	8	21	28	13	0.2197
488.19		0.1	7	22	32	12	1.53823
488.226		0.03	6	23	36	11	2.435
488.263	Y	0.06	5	24	40	10	0.836267
490.169		0.03	7	21	30	13	0.917667
490.206		0.01	6	22	34	12	3.07963
490.242		0.02	5	23	38	11	1.33897
490.278		0.07	4	24	42	10	0.1338
492.148		0.21	7	20	28	14	0.2315
492.185		0.01	6	21	32	13	2.4689
492.221		0.04	5	22	36	12	2.4735
492.258		0.07	4	23	40	11	0.3337
494.164		0.08	6	20	30	14	0.654633
494.2		0.01	5	21	34	13	3.88187
494.216		0.22	9	25	34	10	0.289533
494.237		0	4	22	38	12	0.799033
494.252		0.06	8	26	38	9	0.383633
496.18		0.02	5	20	32	14	0.885533
496.195		0.25	9	24	32	11	0.370733
496.216		0.01	4	21	36	13	1.6199
496.231		0.09	8	25	36	10	0.950133
496.268		0.01	7	26	40	9	0.8362
498.174		0.44	9	23	30	12	0.16995
498.195		0.07	4	20	34	14	0.5022
498.211		0.05	8	24	34	11	1.20693
498.247		0.01	7	25	38	10	2.05377
498.283		0.07	6	26	42	9	0.742267
500.19		0.57	8	23	32	12	0.800567
500.226		0.02	7	24	36	11	2.6251
500.263		0.01	6	25	40	10	2.0293
500.299		0.01	5	26	44	9	0.210033
502.169		1.76	8	22	30	13	0.3373
502.206		0.04	7	23	34	12	1.91497
502.242		0.04	6	24	38	11	2.6955
502.278	Y	0.04	5	25	42	10	0.6932
504.185		0.02	7	22	32	13	1.0253
504.221		0.09	6	23	36	12	2.4088
504.258		0	5	24	40	11	1.1463
506.164		0.15	7	21	30	14	0.379733
506.2		0	6	22	34	13	2.4692
506.237		0.11	5	23	38	12	1.2962
506.273		0.02	4	24	42	11	0.183367
508.18		0	6	21	32	14	0.843833
508.216		0.03	5	22	36	13	1.6697
508.231		0.05	9	26	36	10	0.344567
508.253		0.09	4	23	40	12	0.3058
508.268		0.04	8	27	40	9	0.3545
510.195		0.12	5	21	34	14	1.0566
510.211		0.08	9	25	34	11	0.475267
510.232		0.04	4	22	38	13	0.427133
510.247		0	8	26	38	10	1.09047
510.283		0.04	7	27	42	9	0.693733
512.175		0.14	5	20	32	15	0.1917
512.19		0.18	9	24	32	12	0.3856
512.211		0.07	4	21	36	14	0.472033
512.226		0.02	8	25	36	11	1.62157
512.263		0.01	7	26	40	10	2.23907
512.299		0.02	6	27	44	9	0.594033
514.206		0.02	8	24	34	12	1.3342
514.242		0.04	7	25	38	11	3.52467
514.278		0.06	6	26	42	10	1.97207
516.185		0.42	8	23	32	13	0.6178
516.221		0.04	7	24	36	12	2.91967
516.258		0.06	6	25	40	11	3.20473
516.294	Y	0.08	5	26	44	10	0.5752
518.164		1.19	8	22	30	14	0.174433
518.2		0.08	7	23	34	13	1.46993
518.237		0.01	6	24	38	12	2.87317
518.273		0.03	5	25	42	11	1.16393
520.18	Y	0.02	7	22	32	14	0.537067
520.216		0	6	23	36	13	1.81173
520.253		0.02	5	24	40	12	1.2593
520.289		0.21	4	25	44	11	0.153
522.195		0.04	6	22	34	14	0.9189
522.232		0.04	5	23	38	13	0.9337
522.247		0.03	9	27	38	10	0.372167
522.268		0.02	4	24	42	12	0.2317
522.283		0.06	8	28	42	9	0.282433
524.175		0.03	6	21	32	15	0.223633
524.19		0.22	10	25	32	12	0.1573
524.211		0.04	5	22	36	14	0.619833
524.226		0.04	9	26	36	11	0.6712
524.247		0.12	4	23	40	13	0.209167
524.263		0.02	8	27	40	10	1.14927
524.299		0.07	7	28	44	9	0.6102
526.19		0.21	5	21	34	15	0.2258
526.206		0.01	9	25	34	12	0.620733
526.227		0.19	4	22	38	14	0.148567
526.242		0.06	8	26	38	11	2.19763
526.278		0.04	7	27	42	10	2.29633
526.315		0.01	6	28	46	9	0.405333
528.185		0.34	9	24	32	13	0.357333
528.221		0.04	8	25	36	12	2.25567
528.258		0.06	7	26	40	11	4.3893
528.294		0.02	6	27	44	10	1.64237
530.2		0.02	8	24	34	13	1.20917
530.237		0.05	7	25	38	12	4.53643
530.273		0	6	26	42	11	3.6649
530.31	Y	0.01	5	27	46	10	0.454767
532.18		0.45	8	23	32	14	0.3539
532.216		0.01	7	24	36	13	2.4102
532.253		0.02	6	25	40	12	4.12153
532.289		0.07	5	26	44	11	1.11563
534.195	Y	0.1	7	23	34	14	0.806933
534.232		0.04	6	24	38	13	2.3286
534.268		0.01	5	25	42	12	1.51757
534.305		0.19	4	26	46	11	0.111367
536.175		0.03	7	22	32	15	0.166233
536.211		0.06	6	23	36	14	0.903367
536.247		0.12	5	24	40	13	0.988367
536.263		0.13	9	28	40	10	0.2591
536.284		0.28	4	25	44	12	0.219367
538.19		0.06	6	22	34	15	0.276267
538.206		0.35	10	26	34	12	0.251633
538.227		0.11	5	23	38	14	0.490467
538.242		0.05	9	27	38	11	0.718733
538.263		0.03	4	24	42	13	0.1777
538.278		0.01	8	28	42	10	1.00057
538.315		0.08	7	29	46	9	0.3434
540.185		0.27	10	25	32	13	0.1656
540.206		0.03	5	22	36	15	0.179333
540.221		0.12	9	26	36	12	0.982933
540.258		0.02	8	27	40	11	2.56433
540.294		0.03	7	28	44	10	1.90013
540.33		0.13	6	29	48	9	0.283167
542.2		0.11	9	25	34	13	0.665133
542.237		0.01	8	26	38	12	3.2782
542.273		0.03	7	27	42	11	5.00343
542.31		0	6	28	46	10	1.25077
544.18		1.45	9	24	32	14	0.2254
544.216		0	8	25	36	13	2.10307
544.253		0.05	7	26	40	12	6.29327
544.289		0.01	6	27	44	11	3.5927
544.325	Y	0.07	5	28	48	10	0.273667
546.195		0.12	8	24	34	14	0.7298
546.232		0.06	7	25	38	13	3.9745
546.268		0.09	6	26	42	12	5.152
546.305		0.08	5	27	46	11	0.9138
548.211	Y	0.03	7	24	36	14	1.4188
548.247		0.06	6	25	40	13	3.4791
548.284		0.01	5	26	44	12	1.63537
550.19		0.06	7	23	34	15	0.2794
550.227		0.01	6	24	38	14	1.40343
550.263		0.03	5	25	42	13	1.31033
550.299		0.22	4	26	46	12	0.230167
552.206		0.02	6	23	36	15	0.339367
552.221		1.95	10	27	36	12	0.2887
552.242		0.08	5	24	40	14	0.596733
552.258		0.13	9	28	40	11	0.713067
552.279		0.19	4	25	44	13	0.208
552.294		0.05	8	29	44	10	0.6254
554.2		1.4	10	26	34	13	0.251567
554.222		0.06	5	23	38	15	0.1934
554.237		0.12	9	27	38	12	1.19997
554.273		0.05	8	28	42	11	2.3391
554.31		0.04	7	29	46	10	1.17923
556.216		0.09	9	26	36	13	1.1108
556.253		0.08	8	27	40	12	4.16793
556.289		0.06	7	28	44	11	4.546
556.325		0.04	6	29	48	10	0.8359
558.195		0.14	9	25	34	14	0.4744
558.232		0.05	8	26	38	13	3.52267
558.268		0.04	7	27	42	12	7.78463
558.305	Y	0.02	6	28	46	11	3.04473
558.341		0.03	5	29	50	10	0.164833
560.211		0.06	8	25	36	14	1.4961
560.247		0.09	7	26	40	13	6.43137
560.284		0.04	6	27	44	12	5.94013
560.32		0.08	5	28	48	11	0.662367
562.19		0.04	8	24	34	15	0.356267
562.227	Y	0.04	7	25	38	14	2.64853
562.263		0.02	6	26	42	13	5.3385
562.299		0.01	5	27	46	12	1.56347
564.206		0.09	7	24	36	15	0.6229
564.242		0.03	6	25	40	14	2.364
564.279		0.01	5	26	44	13	1.74273
564.315		0.22	4	27	48	12	0.161733
566.222		0.01	6	24	38	15	0.577033
566.237		1.76	10	28	38	12	0.265
566.258		0.13	5	25	42	14	0.9073
566.273		0.03	9	29	42	11	0.504067
566.294		0.11	4	26	46	13	0.223667
566.31		0.03	8	30	46	10	0.263467
568.216		1.52	10	27	36	13	0.311867
568.237		0.17	5	24	40	15	0.253833
568.253		0.16	9	28	40	12	1.30613
568.274		0.17	4	25	44	14	0.176633
568.289		0.06	8	29	44	11	1.73757
568.325		0.19	7	30	48	10	0.516767
570.232		0.01	9	27	38	13	1.48003
570.268		0.07	8	28	42	12	4.38477
570.305		0.05	7	29	46	11	2.8811
570.341		0.05	6	30	50	10	0.405167
572.211		0.02	9	26	36	14	0.928767
572.247		0.12	8	27	40	13	5.04633
572.284		0.08	7	28	44	12	7.9443
572.32		0.09	6	29	48	11	2.06977
574.19		0.08	9	25	34	15	0.311067
574.227		0.01	8	26	38	14	2.85217
574.263		0.05	7	27	42	13	9.29143
574.299		0.03	6	28	46	12	5.48483
574.336		0.06	5	29	50	11	0.442433
576.206		0.01	8	25	36	15	0.802767
576.242	Y	0.09	7	26	40	14	4.77
576.279		0.05	6	27	44	13	6.8017
576.315		0	5	28	48	12	1.4435
578.222		0.05	7	25	38	15	1.29967
578.258		0.02	6	26	42	14	3.82743
578.294		0.06	5	27	46	13	1.95217
578.331		0.15	4	28	50	12	0.156933
580.201		0.12	7	24	36	16	0.198167
580.237		0.05	6	25	40	15	1.1397
580.274		0	5	26	44	14	1.30767
580.289		0.31	9	30	44	11	0.233367
580.31		0.09	4	27	48	13	0.232933
582.217		0.1	6	24	38	16	0.172733
582.253		0.05	5	25	42	15	0.4402
582.268		0.19	9	29	42	12	1.1003
582.289		0.1	4	26	46	14	0.172867
582.305		0.09	8	30	46	11	0.714167
584.247		0.14	9	28	40	13	1.8089
584.284		0.1	8	29	44	12	3.57503
584.32		0.03	7	30	48	11	1.24627
586.227		0.02	9	27	38	14	1.5083
586.263		0.08	8	28	42	13	6.03473
586.299		0.06	7	29	46	12	5.654
586.336		0.03	6	30	50	11	0.976633
588.206		0.04	9	26	36	15	0.5864
588.242		0.01	8	27	40	14	4.58213
588.279		0.03	7	28	44	13	10.5174
588.315		0.03	6	29	48	12	3.70867
588.352		0.02	5	30	52	11	0.1766
590.222		0.01	8	26	38	15	1.66233
590.258	Y	0.01	7	27	42	14	7.75037
590.294		0.02	6	28	46	13	7.06903
590.331		0.07	5	29	50	12	0.969133
592.201		0.05	8	25	36	16	0.296867
592.237		0.06	7	26	40	15	2.57887
592.274		0.07	6	27	44	14	5.65573
592.31		0.04	5	28	48	13	1.88943
594.217		0.1	7	25	38	16	0.524833
594.253		0.01	6	26	42	15	2.0763
594.289		0.01	5	27	46	14	1.74067
594.326		0.05	4	28	50	13	0.183267
596.232		0.05	6	25	40	16	0.412067
596.269		0.01	5	26	44	15	0.719033
596.284		0.2	9	30	44	12	0.603433
596.305		0.13	4	27	48	14	0.216267
598.248		0.26	5	25	42	16	0.1494
598.263		0.14	9	29	42	13	1.7505
598.299		0.05	8	30	46	12	1.7484
598.336		0.16	7	31	50	11	0.379067
600.242		0.03	9	28	40	14	1.9839
600.279		0.04	8	29	44	13	5.25767
600.315		0.01	7	30	48	12	2.50067
600.352		0.21	6	31	52	11	0.241233
602.222		0.09	9	27	38	15	1.07993
602.258		0.01	8	28	42	14	6.18407
602.294		0	7	29	46	13	8.49947
602.331		0.03	6	30	50	12	1.75197
604.201		0.26	9	26	36	16	0.261633
604.237		0.03	8	27	40	15	3.11293
604.274	Y	0.02	7	28	44	14	9.99007
604.31		0.02	6	29	48	13	5.21347
604.346		0.11	5	30	52	12	0.431733
606.217		0.09	8	26	38	16	0.758233
606.253		0.04	7	27	42	15	4.86987
606.289		0.05	6	28	46	14	6.77217
606.326		0.02	5	29	50	13	1.24187
608.232		0.02	7	26	40	16	1.1241
608.269		0.01	6	27	44	15	3.46147
608.305		0.09	5	28	48	14	1.7386
610.248		0.01	6	26	42	16	0.8367
610.284		0.05	5	27	46	15	1.07527
610.299		0.16	9	31	46	12	0.257867
610.321		0.24	4	28	50	14	0.184067
612.263		0.2	5	26	44	16	0.3003
612.279		0.16	9	30	44	13	1.15783
612.315		0.15	8	31	48	12	0.5559
614.258		0.01	9	29	42	14	2.1317
614.294		0.01	8	30	46	13	3.0245
614.331		0.08	7	31	50	12	0.6731
616.237		0.05	9	28	40	15	1.71753
616.274		0.04	8	29	44	14	6.0753
616.31		0.05	7	30	48	13	4.3046
616.346		0.05	6	31	52	12	0.4808
618.217		0.03	9	27	38	16	0.599967
618.253		0.03	8	28	42	15	4.6221
618.289	Y	0.07	7	29	46	14	9.0514
618.326		0.03	6	30	50	13	2.66163
620.232		0.06	8	27	40	16	1.54007
620.269		0.02	7	28	44	15	6.90797
620.305		0.03	6	29	48	14	5.55377
620.341		0.12	5	30	52	13	0.675833
622.211		0.12	8	26	38	17	0.255
622.248		0.01	7	27	42	16	2.25303
622.284		0.05	6	28	46	15	4.58033
622.321		0.06	5	29	50	14	1.3736
624.227		0.08	7	26	40	17	0.3441
624.263		0.02	6	27	44	16	1.62993
624.3		0.04	5	28	48	15	1.2604
624.315		0.32	9	32	48	12	0.188267
626.243		0.2	6	26	42	17	0.232567
626.279		0.02	5	27	46	16	0.492933
626.294		0.17	9	31	46	13	0.569033
626.331		0.12	8	32	50	12	0.287433
628.274		0.15	9	30	44	14	1.6331
628.31		0.07	8	31	48	13	1.12957
628.346		0.18	7	32	52	12	0.218533
630.253		0.06	9	29	42	15	1.97707
630.289		0.03	8	30	46	14	3.8974
630.326		0.07	7	31	50	13	1.16493
632.232		0.09	9	28	40	16	1.05003
632.269		0	8	29	44	15	5.13427
632.305	Y	0.06	7	30	48	14	5.2791
632.341		0.1	6	31	52	13	0.803867
634.211		0.19	9	27	38	17	0.243633
634.248		0.01	8	28	42	16	2.5761
634.284		0.02	7	29	46	15	7.1662
634.321		0.03	6	30	50	14	3.32633
634.357		0.02	5	31	54	13	0.1915
636.227		0.02	8	27	40	17	0.5648
636.263		0	7	28	44	16	3.50763
636.3		0.02	6	29	48	15	4.3423
636.336		0.13	5	30	52	14	0.852333
638.243		0.09	7	27	42	17	0.7788
638.279		0.07	6	28	46	16	2.2345
638.316		0.1	5	29	50	15	1.04453
640.258		0.01	6	27	44	17	0.5087
640.295		0.04	5	28	48	16	0.625167
640.31		0.11	9	32	48	13	0.440967
640.346		0.11	8	33	52	12	0.228967
642.289		0.17	9	31	46	14	0.898033
642.326		0.07	8	32	50	13	0.6533
644.269		0.02	9	30	44	15	1.64297
644.305		0.01	8	31	48	14	1.75383
644.341		0.06	7	32	52	13	0.486333
646.248		0	9	29	42	16	1.34357
646.284		0.02	8	30	46	15	3.90933
646.321	Y	0.11	7	31	50	14	1.78433
646.357		0.25	6	32	54	13	0.182867
648.227		0.12	9	28	40	17	0.463567
648.263		0.04	8	29	44	16	3.09777
648.3		0.01	7	30	48	15	4.66673
648.336		0.01	6	31	52	14	0.988033
650.243		0.09	8	28	42	17	1.09853
650.279		0.01	7	29	46	16	4.07757
650.316		0.05	6	30	50	15	2.89683
650.352		0.05	5	31	54	14	0.255467
652.258		0.08	7	28	44	17	1.333
652.295		0	6	29	48	16	2.38843
652.31		0.11	10	33	48	13	0.204633
652.331		0.04	5	30	52	15	0.688367
652.346		0.29	9	34	52	12	0.178067
654.238		0.26	7	27	42	18	0.219033
654.274		0.08	6	28	46	17	0.841333
654.31		0.06	5	29	50	16	0.6216
654.326		0.09	9	33	50	13	0.4477
654.362		0.07	8	34	54	12	0.226767
656.305		0.08	9	32	48	14	0.748267
656.341		0	8	33	52	13	0.5057
658.284		0.07	9	31	46	15	1.1067
658.321		0.01	8	32	50	14	1.0178
658.357		0.02	7	33	54	13	0.317567
660.263		0.07	9	30	44	16	1.32797
660.3		0.06	8	31	48	15	2.0508
660.336	Y	0.07	7	32	52	14	0.745733
662.243		0.03	9	29	42	17	0.669533
662.279		0.01	8	30	46	16	2.81517
662.316		0	7	31	50	15	1.96517
662.352		0.11	6	32	54	14	0.262
664.222		0.12	9	28	40	18	0.164
664.258		0.08	8	29	44	17	1.5037
664.295		0.04	7	30	48	16	3.328
664.331		0.07	6	31	52	15	1.1137
666.238		0.06	8	28	42	18	0.3483
666.274		0.04	7	29	46	17	1.75293
666.31		0.04	6	30	50	16	1.8238
666.326		0.07	10	34	50	13	0.233867
666.347		0.08	5	31	54	15	0.2492
668.253		0.11	7	28	44	18	0.362533
668.29		0.04	6	29	48	17	0.945133
668.305		0.29	10	33	48	14	0.385833
668.326		0.09	5	30	52	16	0.420533
668.341		0.02	9	34	52	13	0.456167
670.269		0.18	6	28	46	18	0.249133
670.321		0.07	9	33	50	14	0.813133
670.357		0.03	8	34	54	13	0.5301
672.3		0.07	9	32	48	15	0.9987
672.336		0.02	8	33	52	14	0.909867
672.373		0.06	7	34	56	13	0.2851
674.279		0	9	31	46	16	1.00503
674.316		0.06	8	32	50	15	1.28013
674.352	Y	0.15	7	33	54	14	0.532733
676.258		0.03	9	30	44	17	0.7604
676.295		0.01	8	31	48	16	1.66883
676.331		0.05	7	32	52	15	0.878967
676.368		0.02	6	33	56	14	0.1368
678.238	Y	0	9	29	42	18	0.246733
678.274		0.04	8	30	46	17	1.51763
678.31		0.06	7	31	50	16	1.5243
678.347		0	6	32	54	15	0.320367
680.253		0.08	8	29	44	18	0.495967
680.29		0.07	7	30	48	17	1.5664
680.326		0	6	31	52	16	0.731733
680.341		0.07	10	35	52	13	0.242667
682.269		0.13	7	29	46	18	0.538
682.305		0.01	6	30	50	17	0.793933
682.321		0.1	10	34	50	14	0.4954
682.342		0.11	5	31	54	16	0.141033
682.357		0.06	9	35	54	13	0.427633
684.285		0.08	6	29	48	18	0.3014
684.3		0.03	10	33	48	15	0.621
684.336		0	9	34	52	14	0.8957
684.373		0.01	8	35	56	13	0.479433
686.316		0.01	9	33	50	15	1.14503
686.352		0.14	8	34	54	14	0.967233
686.388		0.02	7	35	58	13	0.2261
688.295		0.12	9	32	48	16	0.963667
688.331	Y	0.02	8	33	52	15	1.21753
688.368		0.07	7	34	56	14	0.474167
690.274		0.16	9	31	46	17	0.7175
690.31		0.07	8	32	50	16	1.25843
690.347		0.08	7	33	54	15	0.665867
690.383		0.14	6	34	58	14	0.1218
692.253	Y	0.22	9	30	44	18	0.3345
692.29		0.02	8	31	48	17	1.06963
692.326		0.05	7	32	52	16	0.7977
692.362		0.05	6	33	56	15	0.181733
694.269		0.07	8	30	46	18	0.598267
694.305		0.05	7	31	50	17	0.906967
694.342		0.13	6	32	54	16	0.2597
694.357		0.24	10	36	54	13	0.185367
696.285		0.08	7	30	48	18	0.5876
696.321		0.24	6	31	52	17	0.3939
696.336		0.05	10	35	52	14	0.4942
696.373		0.14	9	36	56	13	0.3831
698.3		0.19	6	30	50	18	0.288133
698.316		0.03	10	34	50	15	0.7317
698.352		0.06	9	35	54	14	0.8946
698.388		0.03	8	36	58	13	0.395533
700.295		0.1	10	33	48	16	0.648967
700.331		0.05	9	34	52	15	1.31157
700.368		0.05	8	35	56	14	0.929367
700.404		0	7	36	60	13	0.162633
702.31		0.03	9	33	50	16	1.16693
702.347		0.08	8	34	54	15	1.27523
702.383	Y	0.05	7	35	58	14	0.439433
704.29		0.22	9	32	48	17	0.709433
704.326		0.03	8	33	52	16	1.1912
704.362		0.15	7	34	56	15	0.6721
706.269	Y	0.03	9	31	46	18	0.354933
706.305		0.08	8	32	50	17	0.8384
706.342		0.15	7	33	54	16	0.669267
706.378		0.28	6	34	58	15	0.149533
708.285		0.1	8	31	48	18	0.521433
708.321		0.09	7	32	52	17	0.554333
708.357		0.07	6	33	56	16	0.173
710.264		0.16	8	30	46	19	0.173567
710.3		0.04	7	31	50	18	0.403567
710.337		0.23	6	32	54	17	0.168267
710.352		0.12	10	36	54	14	0.4917
710.388		0	9	37	58	13	0.336267
712.28		0.19	7	30	48	19	0.144967
712.295		0.2	11	34	48	16	0.3007
712.316		0.11	6	31	52	18	0.130067
712.331		0.08	10	35	52	15	0.885367
712.368		0.15	9	36	56	14	0.8489
712.404		0.15	8	37	60	13	0.307067
714.31		0.2	10	34	50	16	0.8882
714.347		0.04	9	35	54	15	1.47717
714.383		0.02	8	36	58	14	0.784667
716.29		0.29	10	33	48	17	0.525167
716.326		0.01	9	34	52	16	1.52757
716.362		0.03	8	35	56	15	1.33307
716.399	Y	0.11	7	36	60	14	0.342967
718.269		0.63	10	32	46	18	0.216367
718.305		0.15	9	33	50	17	0.924867
718.342		0.08	8	34	54	16	1.35833
718.378		0.05	7	35	58	15	0.647333
720.285	Y	0.1	9	32	48	18	0.385567
720.321		0.03	8	33	52	17	0.946667
720.357		0.15	7	34	56	16	0.7059
720.394		0.22	6	35	60	15	0.137767
722.3		0.11	8	32	50	18	0.495767
722.337		0.13	7	33	54	17	0.512733
722.373		0.11	6	34	58	16	0.1726
724.316		0.23	7	32	52	18	0.2857
724.352		0.19	6	33	56	17	0.143667
724.368		0.06	10	37	56	14	0.4156
724.404		0.02	9	38	60	13	0.2213
726.31		0.09	11	35	50	16	0.427467
726.347		0.07	10	36	54	15	0.858367
726.383		0.01	9	37	58	14	0.7448
726.42		0.14	8	38	62	13	0.1988
728.29		0.09	11	34	48	17	0.329033
728.326		0.05	10	35	52	16	1.05463
728.362		0.01	9	36	56	15	1.41877
728.399		0.01	8	37	60	14	0.611133
730.269		0.75	11	33	46	18	0.130933
730.305		0.05	10	34	50	17	0.812
730.342		0.08	9	35	54	16	1.7665
730.378		0.01	8	36	58	15	1.30043
730.415	Y	0	7	37	62	14	0.2335
732.285		0.44	10	33	48	18	0.360233
732.321		0.09	9	34	52	17	1.24217
732.357		0.05	8	35	56	16	1.5699
732.394		0.03	7	36	60	15	0.532333
734.3	Y	0.07	9	33	50	18	0.604367
734.337		0.03	8	34	54	17	1.16867
734.373		0.09	7	35	58	16	0.7711
734.409		0.17	6	36	62	15	0.126733
736.28		0.56	9	32	48	19	0.169367
736.316		0.08	8	33	52	18	0.521067
736.352		0.14	7	34	56	17	0.609933
736.389		0.1	6	35	60	16	0.1405
738.295		0.09	8	32	50	19	0.186833
738.332		0.08	7	33	54	18	0.277267
738.368		0.27	6	34	58	17	0.153667
738.383		0.15	10	38	58	14	0.3359
740.326		0.2	11	36	52	16	0.469033
740.362		0.02	10	37	56	15	0.821167
740.399		0.07	9	38	60	14	0.5069
742.305		0.17	11	35	50	17	0.425433
742.342		0.04	10	36	54	16	1.26467
742.378		0.03	9	37	58	15	1.2862
742.415		0.01	8	38	62	14	0.438567
744.285		0.97	11	34	48	18	0.190533
744.321		0.2	10	35	52	17	1.09647
744.357		0.1	9	36	56	16	1.9351
744.394		0	8	37	60	15	1.0692
746.3		0.04	10	34	50	18	0.5571
746.337		0.02	9	35	54	17	1.6703
746.373		0.02	8	36	58	16	1.67913
746.409		0.01	7	37	62	15	0.416467
748.28		0.28	10	33	48	19	0.180267
748.316	Y	0.04	9	34	52	18	0.8967
748.352		0.01	8	35	56	17	1.4694
748.389		0.08	7	36	60	16	0.682133
750.295		0.11	9	33	50	19	0.272867
750.332		0.03	8	34	54	18	0.7531
750.368		0.07	7	35	58	17	0.6347
750.404		0.02	6	36	62	16	0.150533
752.311		0.07	8	33	52	19	0.254767
752.347		0.11	7	34	56	18	0.359433
752.384		0.07	6	35	60	17	0.148567
754.326		0.22	7	33	54	19	0.1183
754.342		0.39	11	37	54	16	0.460733
754.378		0.04	10	38	58	15	0.6181
754.415		0.12	9	39	62	14	0.261233
756.321		0.32	11	36	52	17	0.5393
756.357		0.04	10	37	56	16	1.22817
756.394		0	9	38	60	15	0.9345
756.43		0.11	8	39	64	14	0.217567
758.3		0.35	11	35	50	18	0.363
758.337		0.09	10	36	54	17	1.41503
758.373		0.13	9	37	58	16	1.8599
758.409		0.14	8	38	62	15	0.771233
760.316		0.06	10	35	52	18	0.896133
760.352		0.05	9	36	56	17	2.00603
760.389		0.12	8	37	60	16	1.50503
760.425		0.04	7	38	64	15	0.277067
762.295		0.02	10	34	50	19	0.315233
762.332	Y	0.02	9	35	54	18	1.2002
762.368		0.01	8	36	58	17	1.69993
762.404		0.01	7	37	62	16	0.569633
764.311		0.02	9	34	52	19	0.448033
764.347		0.04	8	35	56	18	0.9927
764.384		0.23	7	36	60	17	0.689567
766.326		0.15	8	34	54	19	0.383333
766.363		0.34	7	35	58	18	0.479333
766.399		0.5	6	36	62	17	0.1553
768.342		0	7	34	56	19	0.181367
768.357		0.36	11	38	56	16	0.387367
768.394		0.13	10	39	60	15	0.351667
770.337		0.27	11	37	54	17	0.555033
770.373		0.14	10	38	58	16	0.9814
770.409		0.15	9	39	62	15	0.530767
772.316		0.34	11	36	52	18	0.5189
772.352		0.11	10	37	56	17	1.37877
772.389		0.01	9	38	60	16	1.39607
772.425		0.11	8	39	64	15	0.449267
774.295		0.19	11	35	50	19	0.229867
774.332		0.05	10	36	54	18	1.139
774.368		0.01	9	37	58	17	2.07923
774.404		0.02	8	38	62	16	1.10967
776.311		0	10	35	52	19	0.5211
776.347	Y	0.03	9	36	56	18	1.61897
776.384		0.03	8	37	60	17	1.64993
776.42		0.14	7	38	64	16	0.374833
778.326		0.11	9	35	54	19	0.7148
778.363		0.02	8	36	58	18	1.30243
778.399		0.04	7	37	62	17	0.618267
780.342		0.04	8	35	56	19	0.576233
780.379		0.07	7	36	60	18	0.540067
780.415		0.1	6	37	64	17	0.124
782.321		0.22	8	34	54	20	0.163867
782.358		0.16	7	35	58	19	0.256433
784.352		0.46	11	38	56	17	0.5019
784.389		0.07	10	39	60	16	0.6453
786.332		0.32	11	37	54	18	0.554433
786.368		0.14	10	38	58	17	1.24323
786.404		0.1	9	39	62	16	0.855933
788.311		0.5	11	36	52	19	0.303
788.347		0.13	10	37	56	18	1.28873
788.384		0.1	9	38	60	17	1.7293
788.42		0.07	8	39	64	16	0.606067
790.326		0.18	10	36	54	19	0.746067
790.363	Y	0.04	9	37	58	18	1.67733
790.399		0.04	8	38	62	17	1.30217
790.436		0.13	7	39	66	16	0.193
792.306		0.09	10	35	52	20	0.231267
792.342		0.1	9	36	56	19	1.01643
792.379		0.09	8	37	60	18	1.41493
792.415		0.05	7	38	64	17	0.445
794.321		0.02	9	35	54	20	0.32
794.358		0.05	8	36	58	19	0.7996
794.394		0.07	7	37	62	18	0.537333
796.337		0.03	8	35	56	20	0.242033
796.373		0.14	7	36	60	19	0.319533
798.368		0.58	11	39	58	17	0.371633
798.404		0.21	10	40	62	16	0.264133
800.347		0.3	11	38	56	18	0.5443
800.384		0.07	10	39	60	17	0.8892
800.42		0.13	9	40	64	16	0.345233
802.326		0.28	11	37	54	19	0.404867
802.363		0.08	10	38	58	18	1.23613
802.399		0.04	9	39	62	17	1.1169
802.436		0.1	8	40	66	16	0.252433
804.342		0.13	10	37	56	19	0.907933
804.379		0	9	38	60	18	1.59557
804.415		0.07	8	39	64	17	0.769533
806.321		0.11	10	36	54	20	0.3838
806.358		0.07	9	37	58	19	1.2184
806.394		0.05	8	38	62	18	1.19273
806.431		0.05	7	39	66	17	0.243767
808.337		0.03	9	36	56	20	0.4806
808.373		0.03	8	37	60	19	0.880567
808.41		0	7	38	64	18	0.4081
810.353		0.05	8	36	58	20	0.338833
810.389		0	7	37	62	19	0.372233
814.363		0.64	11	39	58	18	0.378
814.399		0.18	10	40	62	17	0.403867
816.342		0.41	11	38	56	19	0.411167
816.379		0.09	10	39	60	18	0.856267
816.415		0.1	9	40	64	17	0.4814
818.358		0.2	10	38	58	19	0.948867
818.394	Y	0.03	9	39	62	18	1.08153
818.431		0.11	8	40	66	17	0.3418
820.337		0.17	10	37	56	20	0.477033
820.373		0.06	9	38	60	19	1.11787
820.41		0.11	8	39	64	18	0.726833
822.353		0.13	9	37	58	20	0.597733
822.389		0.13	8	38	62	19	0.766767
822.425		0.06	7	39	66	18	0.221667
824.368		0.19	8	37	60	20	0.415667
824.405		0.04	7	38	64	19	0.248267
830.358		0.63	11	39	58	19	0.354833
830.394		0.31	10	40	62	18	0.4797
832.373		0.25	10	39	60	19	0.6582
832.41	Y	0.07	9	40	64	18	0.5345
834.353		0.2	10	38	58	20	0.511033
834.389		0.17	9	39	62	19	0.8108
834.425		0.01	8	40	66	18	0.299867
836.368		0.1	9	38	60	20	0.6462
836.405		0.15	8	39	64	19	0.512167
838.384		0.04	8	38	62	20	0.396567
846.389		0.2	10	40	62	19	0.3837
848.368		0.2	10	39	60	20	0.419267
848.405		0.01	9	40	64	19	0.442667
850.384		0.07	9	39	62	20	0.459233
850.42		0.1	8	40	66	19	0.246
852.4		0.05	8	39	64	20	0.246133
